# Supplementary material for: New Insights into Renal Failure in a Cohort of 317 Patients with Autosomal Dominant Forms of Alport Syndrome: Report of Two Novel Heterozygous Mutations in COL4A3
Source: MDPI journal article supplement (doi:10.3390/jcm11164883), 2022-08-19
Supplement: s1 [file s1]

| Patient | Sex     | Gene   | Chromosome position          | cDNA                    | Protein                       | Age at diagnosis | Current age | Age at renal insufficiency | Renal Event | Age at onset | Hematuria | Microhematuria | Proteinuria | Hypoacusia | Reference |
|---------|---------|--------|------------------------------|-------------------------|-------------------------------|------------------|-------------|----------------------------|-------------|--------------|-----------|----------------|-------------|------------|-----------|
| 1       | Mujer   | COL4A4 | NC_000002.11:g.227954583C>T  | NM_000092.4:c.1459+1G>A |                               | 35               | 35          |                            |             | 6            | Sí        | -              | Sí          | -          | [30]      |
| 2       | Mujer   | COL4A4 | NC_000002.11:g.227954583C>T  | NM_000092.4:c.1459+1G>A |                               | <42              | 42          |                            |             | 42           | Sí        | -              | Sí          | -          | [30]      |
| 3       | Mujer   | COL4A4 | NC_000002.11:g.227954583C>T  | NM_000092.4:c.1459+1G>A |                               | <69              | 69          |                            |             | 69           | Sí        | -              | Sí          | -          | [30]      |
| 4       | Hombr e | COL4A3 | NC_000002.11:g.228175583G>A  | NM_000091.4:c.4847G>A   | NP_000082.2:p.Cys1616Tyr      | 41               | 46          | 46                         | ESRD        | 41           | Sí        | -              | Sí          | -          | [28]      |
| 5       | Hombr e | COL4A3 | NC_000002.11:g.228175583G>A  | NM_000091.4:c.4847G>A   | NP_000082.2:p.Cys1616Tyr      | 37               | 55          | 55                         | ESRD        | 37           | -         | -              | Sí          | -          | [28]      |
| 6       | Hombr e | COL4A3 | NC_000002.11:g.228175583G>A  | NM_000091.4:c.4847G>A   | NP_000082.2:p.Cys1616Tyr      | 49               | 50          | 50                         | ESRD        | 49           | -         | -              | Sí          | -          | [28]      |
| 7       | Mujer   | COL4A3 | NC_000002.11:g.228175583G>A  | NM_000091.4:c.4847G>A   | NP_000082.2:p.Cys1616Tyr      | 22               | 22          |                            |             | 22           | -         | -              | Sí          | -          | [28]      |
| 8       | Mujer   | COL4A3 | NC_000002.11:g.228145635G>A  | NM_000091.4:c.2401G>A   | NP_000082.2:p.Gly801Arg       | 26               | 52          | 52                         | ESRD        | 26           | -         | -              | Sí          | -          | [28]      |
| 9       | Mujer   | COL4A3 | NC_000002.11:g.228145635G>A  | NM_000091.4:c.2401G>A   | NP_000082.2:p.Gly801Arg       | 62               | 62          | 62                         | ESRD        | 62           | -         | -              | Sí          | -          | [28]      |
| 10      | Mujer   | COL4A3 | NC_000002.11:g.228145635G>A  | NM_000091.4:c.2401G>A   | NP_000082.2:p.Gly801Arg       | 54               | 59          |                            |             | 54           | -         | -              | Sí          | -          | [28]      |
| 11      | Mujer   | COL4A3 | NC_000002.11:g.228145635G>A  | NM_000091.4:c.2401G>A   | NP_000082.2:p.Gly801Arg       | 54               | 58          |                            |             | 54           | -         | -              | Sí          | -          | [28]      |
| 12      | Mujer   | COL4A3 | NC_000002.11:g.228145635G>A  | NM_000091.4:c.2401G>A   | NP_000082.2:p.Gly801Arg       | 25               | 25          |                            |             | 25           | Sí        | -              | Sí          | -          | [28]      |
| 13      | Mujer   | COL4A3 | NC_000002.11:g.228145635G>A  | NM_000091.4:c.2401G>A   | NP_000082.2:p.Gly801Arg       | 28               | 28          |                            |             | 28           | Sí        | -              | Sí          | -          | [28]      |
| 14      | Mujer   | COL4A3 | NC_000002.11:g.228157923C>T  | NM_000091.4:c.3227C>T   | NP_000082.2:p.Pro1076Leu      | 22               | 22          |                            |             | 22           | -         | -              | Sí          | Sí         | [34]      |
| 15      | Hombr e | COL4A3 | NC_000002.11:g.228157923C>T  | NM_000091.4:c.3227C>T   | NP_000082.2:p.Pro1076Leu      | 16               | 16          |                            |             | 16           | -         | -              | -           | Sí         | [34]      |
| 16      | Hombr e | COL4A3 | NC_000002.11:g.228157923C>T  | NM_000091.4:c.3227C>T   | NP_000082.2:p.Pro1076Leu      | 21               | 21          |                            |             | 21           | -         | -              | Sí          | Sí         | [34]      |
| 17      | Mujer   | COL4A3 | NC_000002.11:g.228157923C>T  | NM_000091.4:c.3227C>T   | NP_000082.2:p.Pro1076Leu      | 20               | 20          |                            |             | 20           | -         | -              | Sí          | Sí         | [34]      |
| 18      | Mujer   | COL4A3 | NC_000002.11:g.228157923C>T  | NM_000091.4:c.3227C>T   | NP_000082.2:p.Pro1076Leu      | 47               | 47          |                            |             | 47           | -         | -              | Sí          | Sí         | [34]      |
| 19      | Hombr e | COL4A3 | NC_000002.11:g.228122329G>A  | NM_000091.4:c.998G>A    | NP_000082.2:p.Gly333Glu       | 26               | 26          |                            |             | 26           | Sí        | -              | -           | Sí         | [34]      |
| 20      | Hombr e | COL4A3 | NC_000002.11:g.228122329G>A  | NM_000091.4:c.998G>A    | NP_000082.2:p.Gly333Glu       | 25               | 25          |                            |             | 25           | Sí        | -              | -           | -          | [34]      |
| 21      | Hombr e | COL4A3 | NC_000002.11:g.228122329G>A  | NM_000091.4:c.998G>A    | NP_000082.2:p.Gly333Glu       | 27               | 27          |                            |             | 27           | Sí        | -              | -           | -          | [34]      |
| 22      | Mujer   | COL4A3 | NC_000002.11:g.228122329G>A  | NM_000091.4:c.998G>A    | NP_000082.2:p.Gly333Glu       | 27               | 27          |                            |             | 27           | Sí        | -              | -           | -          | [34]      |
| 23      | Mujer   | COL4A3 | NC_000002.11:g.228122329G>A  | NM_000091.4:c.998G>A    | NP_000082.2:p.Gly333Glu       | 53               | 53          |                            |             | 53           | Sí        | -              | -           | Sí         | [34]      |
| 24      | Mujer   | COL4A3 | NC_000002.11:g.228122329G>A  | NM_000091.4:c.998G>A    | NP_000082.2:p.Gly333Glu       | 56               | 56          | 56                         | CKD         | 56           | Sí        | -              | Sí          | Sí         | [34]      |
| 25      | Hombr e | COL4A3 | NC_000002.11:g.228122329G>A  | NM_000091.4:c.998G>A    | NP_000082.2:p.Gly333Glu       | 47               | 47          |                            |             | 47           | Sí        | -              | -           | -          | [34]      |
| 26      | Hombr e | COL4A3 | NC_000002.11:g.228122329G>A  | NM_000091.4:c.998G>A    | NP_000082.2:p.Gly333Glu       | 54               | 54          |                            |             | 54           | Sí        | -              | Sí          | Sí         | [34]      |
| 27      | Hombr e | COL4A3 | NC_000002.11:g.228122329G>A  | NM_000091.4:c.998G>A    | NP_000082.2:p.Gly333Glu       | 62               | 62          |                            |             | 62           | Sí        | -              | -           | -          | [34]      |
| 28      | Hombr e | COL4A3 | NC_000002.11:g.228122329G>A  | NM_000091.4:c.998G>A    | NP_000082.2:p.Gly333Glu       | 58               | 58          |                            |             | 58           | Sí        | -              | Sí          | Sí         | [34]      |
| 29      | Hombr e | COL4A4 | NC_000002.11:g.227914787delT | NM_000092.4:c.3213delA  | NP_000083.3:p.Gly1072Glufs*69 | 31               | 37          |                            |             | 37           | -         | Sí             | No          | -          | [32]      |
| 30      | Hombr e | COL4A4 | NC_000002.11:g.227914787delT | NM_000092.4:c.3213delA  | NP_000083.3:p.Gly1072Glufs*69 | 32               | 34          |                            |             | 34           | -         | Sí             | No          | -          | [32]      |
| 31      | Hombr e | COL4A4 | NC_000002.11:g.227914787delT | NM_000092.4:c.3213delA  | NP_000083.3:p.Gly1072Glufs*69 | 24               | 32          |                            |             | 32           | -         | Sí             | No          | -          | [32]      |
| 32      | Mujer   | COL4A4 | NC_000002.11:g.227914787delT | NM_000092.4:c.3213delA  | NP_000083.3:p.Gly1072Glufs*69 | 26               | 27          |                            |             | 27           | -         | Sí             | No          | -          | [32]      |
| 33      | Mujer   | COL4A4 | NC_000002.11:g.227872944A>C  | NM_000092.4:c.4599T>G   | NP_000083.3:p.Tyr1533*        | 46               | 46          |                            |             | 46           | -         | Sí             | Sí          | -          | [37]      |
| 34      | Hombr e | COL4A4 | NC_000002.11:g.227872944A>C  | NM_000092.4:c.4599T>G   | NP_000083.3:p.Tyr1533*        | 52               | 52          |                            |             | 52           | Sí        | -              | No          | -          | [37]      |
| 35      | Mujer   | COL4A4 | NC_000002.11:g.227872944A>C  | NM_000092.4:c.4599T>G   | NP_000083.3:p.Tyr1533*        | 59               | 59          |                            |             | 59           | Sí        | -              | No          | -          | [37]      |
| 36      | Mujer   | COL4A4 | NC_000002.11:g.227942760C>T  | NM_000092.4:c.1837G>A   | NP_000083.3:p.Gly613Arg       | 7                | 7           |                            |             | 7            | -         | Sí             | -           | -          | [7]       |
| 37      | Hombr e | COL4A4 | NC_000002.11:g.227942760C>T  | NM_000092.4:c.1837G>A   | NP_000083.3:p.Gly613Arg       | 45               | 45          |                            |             | 45           | -         | Sí             | -           | -          | [7]       |
| 38      | Mujer   | COL4A4 | NC_000002.11:g.227942760C>T  | NM_000092.4:c.1837G>A   | NP_000083.3:p.Gly613Arg       | 41               | 41          |                            |             | 41           | -         | Sí             | -           | -          | [7]       |
| 39      | Mujer   | COL4A4 | NC_000002.11:g.227966616C>A  | NM_000092.4:c.940G>T    | NP_000083.3:p.Gly314Cys       | 7                | 7           |                            |             | 7            | -         | Sí             | -           | -          | [7]       |
| 40      | Hombr e | COL4A4 | NC_000002.11:g.227966616C>A  | NM_000092.4:c.940G>T    | NP_000083.3:p.Gly314Cys       | 48               | 48          |                            |             | 48           | -         | Sí             | Sí          | -          | [7]       |

|    |         |         |                              |                         |                                |          |          |    |               |          |    |    |    |    |      |
|----|---------|---------|------------------------------|-------------------------|--------------------------------|----------|----------|----|---------------|----------|----|----|----|----|------|
| 41 | Hombr e | COL4A 4 | NC_000002.11:g.227966616C>A  | NM_000092.4:c.940G>T    | NP_000083.3:p.Gly314Cys        | unknow n | unkno wn |    | ESRD          | unkno wn | -  | -  | -  | -  | [7]  |
| 42 | Mujer   | COL4A 4 | NC_000002.11:g.227953413C>A  | NM_000092.4:c.1579G>T   | NP_000083.3:p.Gly527Cys        | 26       | 26       |    |               | 26       | Sí | Sí | Sí | -  | [7]  |
| 43 | Hombr e | COL4A 4 | NC_000002.11:g.227953413C>A  | NM_000092.4:c.1579G>T   | NP_000083.3:p.Gly527Cys        | 40       | 40       |    |               | 40       | -  | Sí | -  | -  | [7]  |
| 44 | Mujer   | COL4A 4 | NC_000002.11:g.227953413C>A  | NM_000092.4:c.1579G>T   | NP_000083.3:p.Gly527Cys        | 47       | 47       |    |               | 47       | -  | Sí | -  | -  | [7]  |
| 45 | Hombr e | COL4A 4 | NC_000002.11:g.227953413C>A  | NM_000092.4:c.1579G>T   | NP_000083.3:p.Gly527Cys        | 76       | 76       |    |               | 76       | -  | Sí | -  | -  | [7]  |
| 46 | Mujer   | COL4A 4 | NC_000002.11:g.227953413C>A  | NM_000092.4:c.1579G>T   | NP_000083.3:p.Gly527Cys        | 21       | 21       |    |               | 21       | Sí | Sí | -  | -  | [7]  |
| 47 | Hombr e | COL4A 4 | NC_000002.11:g.227953413C>A  | NM_000092.4:c.1579G>T   | NP_000083.3:p.Gly527Cys        | 11       | 11       |    |               | 11       | -  | Sí | -  | -  | [7]  |
| 48 | Hombr e | COL4A 4 | NC_000002.11:g.227924119A>C  | NM_000092.4:c.2383+2T>G |                                | 20       | 20       |    |               | 20       | -  | Sí | -  | -  | [7]  |
| 49 | Mujer   | COL4A 4 | NC_000002.11:g.227924119A>C  | NM_000092.4:c.2383+2T>G |                                | 11       | 11       |    |               | 11       | -  | Sí | -  | -  | [7]  |
| 50 | Hombr e | COL4A 4 | NC_000002.11:g.227924119A>C  | NM_000092.4:c.2383+2T>G |                                | 49       | 49       |    | CKD           | 49       | -  | Sí | Sí | -  | [7]  |
| 51 | Hombr e | COL4A 4 | NC_000002.11:g.227924119A>C  | NM_000092.4:c.2383+2T>G |                                | 73       | 73       | 60 | ESRD          | 73       | -  | Sí | Sí | -  | [7]  |
| 52 | Mujer   | COL4A 4 | NC_000002.11:g.227912190C>T  | NM_000092.4:c.3289+1G>A |                                | 16       | 16       |    |               | 16       | -  | Sí | Sí | -  | [7]  |
| 53 | Mujer   | COL4A 4 | NC_000002.11:g.227912190C>T  | NM_000092.4:c.3289+1G>A |                                | 11       | 11       |    |               | 11       | -  | Sí | -  | -  | [7]  |
| 54 | Hombr e | COL4A 4 | NC_000002.11:g.227912190C>T  | NM_000092.4:c.3289+1G>A |                                | 9        | 9        |    |               | 9        | -  | Sí | -  | -  | [7]  |
| 55 | Mujer   | COL4A 4 | NC_000002.11:g.227912190C>T  | NM_000092.4:c.3289+1G>A |                                | 6        | 6        |    |               | 6        | -  | Sí | -  | -  | [7]  |
| 56 | Hombr e | COL4A 4 | NC_000002.11:g.227912190C>T  | NM_000092.4:c.3289+1G>A |                                | 34       | 34       |    | CKD           | 34       | -  | Sí | Sí | -  | [7]  |
| 57 | Mujer   | COL4A 4 | NC_000002.11:g.227912190C>T  | NM_000092.4:c.3289+1G>A |                                | 40       | 40       |    |               | 40       | -  | Sí | Sí | -  | [7]  |
| 58 | Hombr e | COL4A 4 | NC_000002.11:g.227912190C>T  | NM_000092.4:c.3289+1G>A |                                | 42       | 42       |    |               | 42       | -  | Sí | -  | -  | [7]  |
| 59 | Hombr e | COL4A 4 | NC_000002.11:g.227912190C>T  | NM_000092.4:c.3289+1G>A |                                | 55       | 55       | 45 | ESRD          | 55       | -  | Sí | Sí | -  | [7]  |
| 60 | Mujer   | COL4A 4 | NC_000002.11:g.227912190C>T  | NM_000092.4:c.3289+1G>A |                                | 64       | 64       | 60 | ESRD          | 64       | -  | Sí | Sí | -  | [7]  |
| 61 | Mujer   | COL4A 4 | NC_000002.11:g.227942712delG | NM_000092.4:c.1889delC  | NP_000083.3:p.Pro630Glnfs*23   | 25       | 25       |    |               | 25       | -  | Sí | Sí | -  | [7]  |
| 62 | Hombr e | COL4A 4 | NC_000002.11:g.227942712delG | NM_000092.4:c.1889delC  | NP_000083.3:p.Pro630Glnfs*23   | 55       | 55       |    |               | 25       | -  | Sí | -  | -  | [7]  |
| 63 | Hombr e | COL4A 4 | NC_000002.11:g.227953413delC | NM_000092.4:c.1580delG  | NP_000083.3:p.Gly527Valfs*126  | 43       | 43       | 40 | CKD           | 43       | -  | Sí | Sí | -  | [7]  |
| 64 | Mujer   | COL4A 4 | NC_000002.11:g.227953413delC | NM_000092.4:c.1580delG  | NP_000083.3:p.Gly527Valfs*126  | 15       | 15       |    |               | 15       | -  | Sí | Sí | -  | [7]  |
| 65 | Hombr e | COL4A 4 | NC_000002.11:g.227875059delC | NM_000092.4:c.4494delG  | NP_000083.3:p.Gln1499Lysfs*53  | 33       | 33       |    |               | 33       | -  | Sí | Sí | -  | [7]  |
| 66 | Mujer   | COL4A 4 | NC_000002.11:g.227966581C>G  | NM_000092.4:c.975G>C    | NP_000083.3:p.Lys325Asn        | 8        | 31       | 29 | ESRD          | 8        | Sí | -  | -  | Sí | [19] |
| 67 | Hombr e | COL4A 4 | NC_000002.11:g.227966581C>G  | NM_000092.4:c.975G>C    | NP_000083.3:p.Lys325Asn        | 5        | 26       |    |               | 5        | Sí | -  | -  | -  | [19] |
| 68 | Hombr e | COL4A 4 | NC_000002.11:g.227966581C>G  | NM_000092.4:c.975G>C    | NP_000083.3:p.Lys325Asn        | 40       | 66       | 66 | ESRD          | 40       | Sí | -  | -  | Sí | [19] |
| 69 | Mujer   | COL4A 4 | NC_000002.11:g.227966581C>G  | NM_000092.4:c.975G>C    | NP_000083.3:p.Lys325Asn        | 40       | 54       |    |               | 40       | Sí | -  | -  | Sí | [19] |
| 70 | Hombr e | COL4A 4 | NC_000002.11:g.227966581C>G  | NM_000092.4:c.975G>C    | NP_000083.3:p.Lys325Asn        | 54       | 66       | 60 | Dialysis      | 54       | -  | -  | -  | Sí | [19] |
| 71 | Mujer   | COL4A 4 | NC_000002.11:g.227886785T>A  | NM_000092.4:c.4195A>T   | NP_000083.3:p.Met1399Leu       | 26       | 26       |    |               | 26       | Sí | -  | Sí | Sí | [33] |
| 72 | Hombr e | COL4A 4 | NC_000002.11:g.227886785T>A  | NM_000092.4:c.4195A>T   | NP_000083.3:p.Met1399Leu       | 60       | 62       | 60 | Dialysis      | 60       | -  | -  | -  | -  | [33] |
| 73 | Hombr e | COL4A 4 | NC_000002.11:g.227886785T>A  | NM_000092.4:c.4195A>T   | NP_000083.3:p.Met1399Leu       | 45       | 45       | 62 | Renal failure | 45       | Sí | -  | Sí | Sí | [33] |
| 74 | Hombr e | COL4A 4 | NC_000002.11:g.227942800A>G  | NM_000092.4:c.1804-7T>C |                                | 26       | 26       |    |               | 26       | -  | Sí | Sí | Sí | [38] |
| 75 | Mujer   | COL4A 4 | NC_000002.11:g.227942800A>G  | NM_000092.4:c.1804-7T>C |                                | 23       | 23       |    |               | 23       | -  | Sí | Sí | Sí | [38] |
| 76 | Mujer   | COL4A 4 | NC_000002.11:g.227942800A>G  | NM_000092.4:c.1804-7T>C |                                | 49       | 49       |    |               | 49       | -  | Sí | Sí | Sí | [38] |
| 77 | Hombr e | COL4A 4 | NC_000002.11:g.227942800A>G  | NM_000092.4:c.1804-7T>C |                                | 51       | 51       |    |               | 51       | -  | Sí | Sí | -  | [38] |
| 78 | Hombr e | COL4A 4 | NC_000002.11:g.227914787delT | NM_000092.4:c.3213delA  | NP_000083.3:p.Gly1072Gluufs*69 | 31       | 32       |    |               | 31       | -  | Sí | No | -  | [32] |
| 79 | Hombr e | COL4A 4 | NC_000002.11:g.227914787delT | NM_000092.4:c.3213delA  | NP_000083.3:p.Gly1072Gluufs*69 | 45       | 75       | 75 | CKD           | 45       | -  | Sí | Sí | -  | [32] |
| 80 | Mujer   | COL4A 4 | NC_000002.11:g.227914787delT | NM_000092.4:c.3213delA  | NP_000083.3:p.Gly1072Gluufs*69 | 40       | 65       |    | CKD           | 65       | -  | Sí | Sí | -  | [32] |
| 81 | Hombr e | COL4A 4 | NC_000002.11:g.227914787delT | NM_000092.4:c.3213delA  | NP_000083.3:p.Gly1072Gluufs*69 | 45       | 61       | 60 | ESRD          | 45       | -  | Sí | Sí | -  | [32] |
| 82 | Hombr e | COL4A 4 | NC_000002.11:g.227914787delT | NM_000092.4:c.3213delA  | NP_000083.3:p.Gly1072Gluufs*69 | 43       | 58       | 56 | ESRD          | 43       | -  | Sí | Sí | -  | [32] |

|     |         |        |                                                 |                                      |                                     |     |    |     |     |     |    |    |    |    |      |
|-----|---------|--------|-------------------------------------------------|--------------------------------------|-------------------------------------|-----|----|-----|-----|-----|----|----|----|----|------|
| 83  | Mujer   | COL4A4 | NC_000002.11:g.227914787delT                    | NM_000092.4:c.3213delA               | NP_000083.3:p.Gly1072Gluufs*69      | 35  | 41 |     |     | 35  | -  | Si | No | -  | [32] |
| 84  | Mujer   | COL4A4 | NC_000002.11:g.227917119C>A                     | NM_000092.4:c.2870G>T                | NP_000083.3:p.Gly957Val             | 13  | 31 |     |     | 13  | -  | Si | -  | -  | [22] |
| 85  | Hombr e | COL4A4 | NC_000002.11:g.227917119C>A                     | NM_000092.4:c.2870G>T                | NP_000083.3:p.Gly957Val             | <52 | 52 | 52  | RT  | 52  | -  | -  | -  | -  | [22] |
| 86  | Hombr e | COL4A4 | NC_000002.11:g.227917119C>A                     | NM_000092.4:c.2870G>T                | NP_000083.3:p.Gly957Val             | 1   | 1  |     |     | <1  | -  | Si | -  | -  | [22] |
| 87  | Hombr e | COL4A4 | NC_000002.11:g.227917119C>A                     | NM_000092.4:c.2870G>T                | NP_000083.3:p.Gly957Val             | <59 | 59 |     |     | 59  | -  | Si | -  | -  | [22] |
| 88  | Mujer   | COL4A4 | NC_000002.11:g.227917119C>A                     | NM_000092.4:c.2870G>T                | NP_000083.3:p.Gly957Val             | <41 | 41 | <41 | CKD | 41  | -  | -  | -  | -  | [22] |
| 89  | Hombr e | COL4A4 | NC_000002.11:g.227872214A>T                     | NM_000092.4:c.4900T>A                | NP_000083.3:p.Cys1634Ser            | 37  | 45 |     |     | 37  | Si | Si | -  | Si | [22] |
| 90  | Hombr e | COL4A4 | NC_000002.11:g.227872214A>T                     | NM_000092.4:c.4900T>A                | NP_000083.3:p.Cys1634Ser            | 3   | 13 |     |     | 13  | Si | Si | -  | -  | [22] |
| 91  | Hombr e | COL4A4 | NC_000002.11:g.227872214A>T                     | NM_000092.4:c.4900T>A                | NP_000083.3:p.Cys1634Ser            | <51 | 51 |     |     | 51  | Si | Si | -  | Si | [22] |
| 92  | Hombr e | COL4A3 | NC_000002.11:g.228155526G>T                     | NM_000091.4:c.3134G>T                | NP_000082.2:p.Gly1045Val            | 18  | 55 | 55  | CKD | 18  | -  | Si | Si | Si | [22] |
| 93  | Mujer   | COL4A3 | NC_000002.11:g.228155526G>T                     | NM_000091.4:c.3134G>T                | NP_000082.2:p.Gly1045Val            | 32  | 32 |     |     | 32  | -  | Si | -  | -  | [22] |
| 94  | Hombr e | COL4A3 | NC_000002.11:g.228155526G>T                     | NM_000091.4:c.3134G>T                | NP_000082.2:p.Gly1045Val            | 24  | 24 |     |     | 24  | -  | Si | -  | -  | [22] |
| 95  | Hombr e | COL4A3 | NC_000002.11:g.228155526G>T                     | NM_000091.4:c.3134G>T                | NP_000082.2:p.Gly1045Val            | 21  | 21 |     |     | 21  | -  | Si | -  | -  | [22] |
| 96  | Mujer   | COL4A3 | NC_000002.11:g.228155526G>T                     | NM_000091.4:c.3134G>T                | NP_000082.2:p.Gly1045Val            | 68  | 68 | 68  | CKD | <68 | -  | Si | -  | -  | [22] |
| 97  | Hombr e | COL4A3 | NC_000002.11:g.228155526G>T                     | NM_000091.4:c.3134G>T                | NP_000082.2:p.Gly1045Val            | 44  | 44 |     |     | 44  | -  | Si | -  | -  | [22] |
| 98  | Hombr e | COL4A3 | NC_000002.11:g.228110697G>A                     | NM_000091.4:c.352G>A                 | NP_000082.2:p.Gly118Arg             | 29  | 29 |     |     | 29  | -  | -  | Si | -  | [28] |
| 99  | Mujer   | COL4A3 | NC_000002.11:g.228110697G>A                     | NM_000091.4:c.352G>A                 | NP_000082.2:p.Gly118Arg             | 70  | 70 |     |     | 70  | -  | -  | Si | -  | [28] |
| 100 | Hombr e | COL4A3 | NC_000002.11:g.228154724G>A                     | NM_000091.4:c.2990G>A                | NP_000082.2:p.Gly997Glu             | 30  | 38 |     |     | 30  | Si | -  | Si | -  | [28] |
| 101 | Hombr e | COL4A3 | NC_000002.11:g.228154724G>A                     | NM_000091.4:c.2990G>A                | NP_000082.2:p.Gly997Glu             | 15  | 15 |     |     | 15  | -  | -  | Si | -  | [28] |
| 102 | Mujer   | COL4A3 | NC_000002.11:g.228154724G>A                     | NM_000091.4:c.2990G>A                | NP_000082.2:p.Gly997Glu             | 56  | 70 |     |     | 56  | Si | -  | Si | -  | [28] |
| 103 | Mujer   | COL4A3 | NC_000002.11:g.228154724G>A                     | NM_000091.4:c.2990G>A                | NP_000082.2:p.Gly997Glu             | 30  |    |     |     | 30  | Si | -  | Si | -  | [28] |
| 104 | Mujer   | COL4A3 | NC_000002.11:g.228144593T>A                     | NM_000091.4:c.2210T>A                | NP_000082.2:p.Leu737His             | 19  | 35 |     |     | 19  | -  | -  | Si | -  | [28] |
| 105 | Mujer   | COL4A3 | NC_000002.11:g.228144593T>A                     | NM_000091.4:c.2210T>A                | NP_000082.2:p.Leu737His             | 57  | 58 |     |     | 58  | -  | -  | Si | -  | [31] |
| 106 | Mujer   | COL4A4 | NC_000002.11:g.227963516T>G                     | NM_000092.4:c.1100-2A>C              |                                     | 12  |    |     |     | 12  | -  | Si | -  | -  | [31] |
| 107 | Hombr e | COL4A4 | NC_000002.11:g.227963516T>G                     | NM_000092.4:c.1100-2A>C              |                                     | 5   |    |     |     | 5   | Si | -  | -  | -  | [31] |
| 108 | Mujer   | COL4A4 | NC_000002.11:g.227963516T>G                     | NM_000092.4:c.1100-2A>C              |                                     | 38  |    |     |     | 38  | Si | -  | -  | -  | [31] |
| 109 | Hombr e | COL4A4 | NC_000002.11:g.227915693_227915698delCTGGTCinsG | NM_000092.4:c.3145_3150delGACCAGinsC | NP_000083.3:Asp1049Argfs*2          | 32  | 32 |     |     | 32  | Si | -  | -  | -  | [23] |
| 110 | Hombr e | COL4A4 | NC_000002.11:g.227915693_227915698delCTGGTCinsG | NM_000092.4:c.3145_3150delGACCAGinsC | NP_000083.3:Asp1049Argfs*2          | 7   | 7  |     |     | 7   | Si | -  | -  | -  | [23] |
| 111 | Mujer   | COL4A4 | NC_000002.11:g.227919308A>C                     | NM_000092.4:c.2860+2T>G              |                                     | 41  | 48 |     |     | 41  | Si | -  | -  | -  | [23] |
| 112 | Hombr e | COL4A4 | NC_000002.11:g.227919308A>C                     | NM_000092.4:c.2860+2T>G              |                                     | 18  | 18 |     |     | 18  | Si | -  | -  | -  | [23] |
| 113 | Hombr e | COL4A4 | NC_000002.11:g.227912190C>T                     | NM_000092.4:c.3289+1G>A              |                                     | 36  | 36 |     |     | 36  | Si | -  | -  | -  | [23] |
| 114 | Mujer   | COL4A4 | NC_000002.11:g.227912190C>T                     | NM_000092.4:c.3289+1G>A              |                                     | 13  | 13 |     |     | 13  | Si | -  | -  | -  | [23] |
| 115 | Mujer   | COL4A4 | NC_000002.11:g.227924184C>G                     | NM_000092.4:c.2320G>C                | NP_000083.3:p.Gly774Arg             | 38  | 38 |     |     | 39  | Si | -  | -  | -  | [23] |
| 116 | Hombr e | COL4A3 | NC_000002.11:g.228131759G>T                     | NM_000091.4:c.1459G>T                | NP_000082.2:p.Gly487Cys             | 38  | 38 |     |     | 38  | Si | -  | -  | -  | [23] |
| 117 | Mujer   | COL4A3 | NC_000002.11:g.228154778G>A                     | NM_000091.4:c.3044G>A                | NP_000082.2:p.Gly1015Glu            | 36  | 36 |     |     | 36  | Si | -  | -  | -  | [23] |
| 118 | Mujer   | COL4A4 | NC_000002.11:g.227924184C>G                     | NM_000092.4:c.2320G>C                | NP_000083.3:p.Gly774Arg             | 36  | 36 |     |     | 36  | Si | -  | -  | -  | [23] |
| 119 | Hombr e | COL4A4 | NC_000002.11:g.227924184C>G                     | NM_000092.4:c.2320G>C                | NP_000083.3:p.Gly774Arg             | 18  | 18 |     |     | 18  | Si | -  | -  | -  | [23] |
| 120 | Hombr e | COL4A4 | NC_000002.11:g.227924184C>G                     | NM_000092.4:c.2320G>C                | NP_000083.3:p.Gly774Arg             | 16  | 16 |     |     | 16  | Si | -  | -  | -  | [23] |
| 121 | Mujer   | COL4A3 | NC_000002.11:g.228131759G>T                     | NM_000091.4:c.1459G>T                | NP_000082.2:p.Gly487Cys             | 13  | 13 |     |     | 13  | Si | -  | -  | -  | [23] |
| 122 | Mujer   | COL4A3 | NC_000002.11:g.228154778G>A                     | NM_000091.4:c.3044G>A                | NP_000082.2:p.Gly1015Glu            | 20  | 20 |     |     | 20  | Si | -  | -  | -  | [23] |
| 123 | Mujer   | COL4A3 | NC_000002.11:g.228154778G>A                     | NM_000091.4:c.3044G>A                | NP_000082.2:p.Gly1015Glu            | 16  | 16 |     |     | 16  | Si | -  | -  | -  | [23] |
| 124 | Mujer   | COL4A3 | NC_000002.11:g.228160015_228160016insAGG        | NM_000091.4:c.3548_3549insAGG        | NP_000082.2:p.Gly1183_Asn1184insGly | 56  | 56 |     |     | 56  | Si | -  | -  | -  | [23] |

|     |        |        |                                                         |                                            |                                |     |     |    |          |     |    |    |    |    |      |
|-----|--------|--------|---------------------------------------------------------|--------------------------------------------|--------------------------------|-----|-----|----|----------|-----|----|----|----|----|------|
| 125 | Hombre | COL4A3 | NC_000002.11:g.228128660G>A                             | NM_000091.4:c.1315G>A                      | NP_000082.2:p.Gly439Ser        | 36  | 36  | 35 | ESRD     | <36 | Si | -  | Si | Si | [18] |
| 126 | Mujer  | COL4A4 | NC_000002.11:g.227958874_227958891delCTCCAGGCAAGCCAGGTG | NM_000092.4:c.1323_1340delTGGCTTGCTGGAGCAC | NP_000083.3:p.Gly442_Pro447del | 17  | 45  |    |          | 17  | -  | -  | Si | -  | [2]  |
| 127 | Hombre | COL4A3 | NC_000002.11:g.228153966T>A                             | NM_000091.4:c.2980+2T>A                    |                                | 42  | 43  |    |          | 42  | -  | -  | Si | -  | [2]  |
| 128 | Mujer  | COL4A4 | NC_000002.11:g.227942789T>C                             | NM_000092.4:c.1808A>G                      | NP_000083.3:p.Asp603Gly        | 35  | 46  |    |          | 42  | -  | -  | Si | -  | [2]  |
| 129 | Mujer  | COL4A4 | NC_000002.11:g.227945229C>A                             | NM_000092.4:c.1733G>T                      | NP_000083.3:p.Gly578Val        | 9   | 48  |    |          | 9   | -  | -  | Si | -  | [2]  |
| 130 | Hombre | COL4A4 | NC_000002.11:g.227945229C>A                             | NM_000092.4:c.1733G>T                      | NP_000083.3:p.Gly578Val        | 32  | 82  | 63 | ESRD     | 32  | -  | -  | Si | -  | [2]  |
| 131 | Mujer  | COL4A4 | NC_000002.11:g.227919444C>T                             | NM_000092.4:c.2726G>A                      | NP_000083.3:p.Gly909Glu        | 16  | 26  |    |          | 16  | -  | -  | Si | -  | [2]  |
| 132 | Hombre | COL4A3 | NC_000002.11:g.228137761G>A                             | NM_000091.4:c.1855G>A                      | NP_000082.2:p.Gly619Arg        | 5   | 26  |    |          | 5   | -  | -  | Si | -  | [2]  |
| 133 | Mujer  | COL4A3 | NC_000002.11:g.228159760G>A                             | NM_000091.4:c.3499G>A                      | NP_000082.2:p.Gly1167Arg       | 5   | 31  |    |          | 5   | -  | -  | Si | -  | [2]  |
| 134 | Hombre | COL4A3 | NC_000002.11:g.228137807G>A                             | NM_000091.4:c.1901G>A                      | NP_000082.2:p.Gly634Glu        | 11  | 36  |    |          | 11  | -  | -  | Si | -  | [2]  |
| 135 | Hombre | COL4A3 | NC_000002.11:g.228137761G>A                             | NM_000091.4:c.1855G>A                      | NP_000082.2:p.Gly619Arg        | 20  | 45  |    |          | 20  | -  | -  | Si | -  | [2]  |
| 136 | Hombre | COL4A4 | NC_000002.11:g.227958874_227958891delCTCCAGGCAAGCCAGGTG | NM_000092.4:c.1323_1340delTGGCTTGCTGGAGCAC | NP_000083.3:p.Gly442_Pro447del | 17  | 29  |    |          | 17  | -  | -  | Si | -  | [2]  |
| 137 | Mujer  | COL4A4 | NC_000002.11:g.227924932C>T                             | NM_000092.4:c.2084G>A                      | NP_000083.3:p.Gly695Asp        | 6   | 11  |    |          | 6   | -  | -  | Si | -  | [2]  |
| 138 | Mujer  | COL4A3 | NC_000002.11:g.228159725G>A                             | NM_000091.4:c.3464G>A                      | NP_000082.2:p.Gly1155Asp       | 44  | 69  |    |          | 44  | -  | -  | Si | Si | [2]  |
| 139 | Hombre | COL4A3 | NC_000002.11:g.228155526G>T                             | NM_000091.4:c.3134G>T                      | NP_000082.2:p.Gly1045Val       | 37  | 37  |    |          | 37  | -  | Si | -  | -  | [22] |
| 140 | Mujer  | COL4A3 | NC_000002.11:g.228155526G>T                             | NM_000091.4:c.3134G>T                      | NP_000082.2:p.Gly1045Val       | 84  | 88  | 84 | Dialysis | 84  | -  | -  | -  | Si | [22] |
| 141 | Hombre | COL4A3 | NC_000002.11:g.228162479G>T                             | NM_000091.4:c.3655G>T                      | NP_000082.2:p.Gly1219Cys       | 18  | 49  | 45 | Dialysis | 18  | -  | Si | Si | -  | [22] |
| 142 | Hombre | COL4A3 | NC_000002.11:g.228162479G>T                             | NM_000091.4:c.3655G>T                      | NP_000082.2:p.Gly1219Cys       | 20  | 46  |    |          | 20  | -  | Si | -  | Si | [22] |
| 143 | Hombre | COL4A3 | NC_000002.11:g.228162479G>T                             | NM_000091.4:c.3655G>T                      | NP_000082.2:p.Gly1219Cys       | 45  | 45  |    |          | <45 | -  | Si | Si | Si | [22] |
| 144 | Hombre | COL4A3 | NC_000002.11:g.228162479G>T                             | NM_000091.4:c.3655G>T                      | NP_000082.2:p.Gly1219Cys       | 20  | 36  |    |          | 20  | -  | Si | -  | -  | [22] |
| 145 | Mujer  | COL4A3 | NC_000002.11:g.228162479G>T                             | NM_000091.4:c.3655G>T                      | NP_000082.2:p.Gly1219Cys       | 20  | 20  |    |          | 20  | -  | Si | -  | -  | [22] |
| 146 | Mujer  | COL4A3 | NC_000002.11:g.228162479G>T                             | NM_000091.4:c.3655G>T                      | NP_000082.2:p.Gly1219Cys       | <70 | 72  | 70 | Dialysis | 70  | -  | -  | -  | -  | [22] |
| 147 | Hombre | COL4A3 | NC_000002.11:g.228172594T>C                             | NM_000091.4:c.4421T>C                      | NP_000082.2:p.Leu1474Pro       | 36  | 40  | 40 | ESRD     | 36  | -  | -  | -  | -  | [5]  |
| 148 | Hombre | COL4A3 | NC_000002.11:g.228172594T>C                             | NM_000091.4:c.4421T>C                      | NP_000082.2:p.Leu1474Pro       | 36  | 40  | 40 | ESRD     | 36  | -  | -  | -  | -  | [5]  |
| 149 | Mujer  | COL4A3 | NC_000002.11:g.228112275G>T                             | NM_000091.4:c.443G>T                       | NP_000082.2:p.Gly148Val        | 35  | 35  |    |          | <35 | Si | -  | Si | -  | [5]  |
| 150 | Hombre | COL4A3 | NC_000002.11:g.228112275G>T                             | NM_000091.4:c.443G>T                       | NP_000082.2:p.Gly148Val        | 65  | 72  | 82 | ESRD     | 65  | -  | -  | -  | -  | [5]  |
| 151 | Hombre | COL4A3 | NC_000002.11:g.228176554C>T                             | NM_000091.4:c.4981C>T                      | NP_000082.2:p.Arg1661Cys       | 18  | 37  | 37 | ESRD     | 18  | Si | -  | Si | -  | [5]  |
| 152 | Hombre | COL4A3 | NC_000002.11:g.228176554C>T                             | NM_000091.4:c.4981C>T                      | NP_000082.2:p.Arg1661Cys       | 33  | 33  |    |          | 33  | -  | -  | Si | -  | [5]  |
| 153 | Mujer  | COL4A3 | NC_000002.11:g.228142227G>A                             | NM_000091.4:c.2083G>A                      | NP_000082.2:p.Gly695Arg        | 36  | 50  | 50 | ESRD     | 36  | -  | -  | Si | Si | [5]  |
| 154 | Mujer  | COL4A3 | NC_000002.11:g.228142227G>A                             | NM_000091.4:c.2083G>A                      | NP_000082.2:p.Gly695Arg        | 64  | 64  |    |          | <64 | -  | -  | Si | Si | [5]  |
| 155 | Hombre | COL4A3 | NC_000002.11:g.228142227G>A                             | NM_000091.4:c.2083G>A                      | NP_000082.2:p.Gly695Arg        | 39  | 39  |    |          | 39  | Si | -  | Si | Si | [5]  |
| 156 | Mujer  | COL4A3 | NC_000002.11:g.228142227G>A                             | NM_000091.4:c.2083G>A                      | NP_000082.2:p.Gly695Arg        | 37  | 37  |    |          | 37  | -  | -  | Si | Si | [5]  |
| 157 | Hombre | COL4A3 | NC_000002.11:g.228142227G>A                             | NM_000091.4:c.2083G>A                      | NP_000082.2:p.Gly695Arg        | 40  | 40  |    |          | 40  | Si | -  | No | Si | [5]  |
| 158 | Mujer  | COL4A4 | NC_000002.11:g.227983440C>T                             | NM_000092.4:c.410G>A                       | NP_000083.3:p.Gly137Asp        | 35  | 35  |    |          | 35  | Si | -  | Si | -  | [5]  |
| 159 | Hombre | COL4A4 | NC_000002.11:g.227983440C>T                             | NM_000092.4:c.410G>A                       | NP_000083.3:p.Gly137Asp        | 32  | 42  | 42 | ESRD     | 32  | -  | -  | Si | -  | [5]  |
| 160 | Mujer  | COL4A4 | NC_000002.11:g.227983440C>T                             | NM_000092.4:c.410G>A                       | NP_000083.3:p.Gly137Asp        | 32  | 41  | 41 | ESRD     | 32  | -  | -  | Si | -  | [5]  |
| 161 | Hombre | COL4A4 | NC_000002.11:g.227983440C>T                             | NM_000092.4:c.410G>A                       | NP_000083.3:p.Gly137Asp        | 44  | 44  | 44 | ESRD     | 44  | -  | -  | -  | -  | [5]  |
| 162 | Hombre | COL4A4 | NC_000002.11:g.227983440C>T                             | NM_000092.4:c.410G>A                       | NP_000083.3:p.Gly137Asp        | 60  | <60 | 60 | ESRD     | 60  | -  | -  | -  | -  | [5]  |
| 163 | Mujer  | COL4A4 | NC_000002.11:g.227917083G>C                             | NM_000092.4:c.2906C>G                      | NP_000083.3:p.Ser969*          | 2   | 2   |    |          | 2   | Si | -  | -  | -  | [5]  |
| 164 | Mujer  | COL4A4 | NC_000002.11:g.227917083G>C                             | NM_000092.4:c.2906C>G                      | NP_000083.3:p.Ser969*          | 5   | 5   |    |          | 5   | Si | -  | -  | -  | [5]  |
| 165 | Hombre | COL4A4 | NC_000002.11:g.227917083G>C                             | NM_000092.4:c.2906C>G                      | NP_000083.3:p.Ser969*          | 2   | 2   |    |          | 2   | Si | -  | -  | -  | [5]  |
| 166 | Hombre | COL4A4 | NC_000002.11:g.227917083G>C                             | NM_000092.4:c.2906C>G                      | NP_000083.3:p.Ser969*          | 20  | 20  |    |          | 20  | Si | -  | -  | -  | [5]  |

|     |         |        |                                                |                                     |                                  |         |         |    |      |         |              |             |              |              |      |
|-----|---------|--------|------------------------------------------------|-------------------------------------|----------------------------------|---------|---------|----|------|---------|--------------|-------------|--------------|--------------|------|
| 167 | Mujer   | COL4A4 | NC_000002.11:g.227917083G>C                    | NM_000092.4:c.2906C>G               | NP_000083.3:p.Ser969*            | 35      | 35      |    |      | 35      | Sí           | -           | Sí           | -            | [5]  |
| 168 | Hombr e | COL4A3 | NC_000002.11:g.228119415G>A                    | NM_000091.4:c.872G>A                | NP_000082.2:p.Gly291Glu          | 13      | 13      |    |      | 13      | Sí           | -           | -            | -            | [25] |
| 169 | Hombr e | COL4A3 | NC_000002.11:g.228119415G>A                    | NM_000091.4:c.872G>A                | NP_000082.2:p.Gly291Glu          | 22      | 46      |    |      | 22      | -            | -           | Sí           | -            | [25] |
| 170 | Hombr e | COL4A3 | NC_000002.11:g.228119415G>A                    | NM_000091.4:c.872G>A                | NP_000082.2:p.Gly291Glu          | <45     | 82      | 70 | ESRD | 45      | -            | -           | -            | -            | [25] |
| 171 | Hombr e | COL4A4 | NC_000002.11:g.227920687C>T                    | NM_000092.4:c.2690G>A               | NP_000083.3:p.Gly897Glu          | 5       | 16      |    |      | 5       | Sí           | -           | Sí           | -            | [15] |
| 172 | Hombr e | COL4A4 | NC_000002.11:g.227920687C>T                    | NM_000092.4:c.2690G>A               | NP_000083.3:p.Gly897Glu          | 76      | 76      |    |      | 76      | Sí           | -           | -            | -            | [15] |
| 173 | Mujer   | COL4A3 | NC_000002.11:g.228159278G>A                    | NM_000091.4:c.3410G>A               | NP_000082.2:p.Gly1137Asp         | 6       | 6       |    |      | 6       | Sí           | -           | -            | -            | [31] |
| 174 | Hombr e | COL4A3 | NC_000002.11:g.228159278G>A                    | NM_000091.4:c.3410G>A               | NP_000082.2:p.Gly1137Asp         | 38      | 38      |    |      | 38      | Sí           | -           | -            | -            | [31] |
| 175 | Hombr e | COL4A3 | NC_000002.11:g.228159278G>A                    | NM_000091.4:c.3410G>A               | NP_000082.2:p.Gly1137Asp         | 12      | 12      |    |      | 12      | Sí           | -           | -            | -            | [31] |
| 176 | Hombr e | COL4A4 | NC_000002.11:g.227927272C>T                    | NM_000092.4:c.2030G>A               | NP_000083.3:p.Gly677Asp          | 15      | 20      |    |      | 15      | -            | Sí          | Sí           | -            | [39] |
| 177 | Hombr e | COL4A4 | NC_000002.11:g.227927272C>T                    | NM_000092.4:c.2030G>A               | NP_000083.3:p.Gly677Asp          | 16      | 16      |    |      | 16      | -            | Sí          | Sí           | -            | [39] |
| 178 | Mujer   | COL4A4 | NC_000002.11:g.227927272C>T                    | NM_000092.4:c.2030G>A               | NP_000083.3:p.Gly677Asp          | 49      | 49      |    |      | 49      | -            | Sí          | Sí           | -            | [39] |
| 179 | Mujer   | COL4A4 | NC_000002.11:g.227927272C>T                    | NM_000092.4:c.2030G>A               | NP_000083.3:p.Gly677Asp          | 43      | 43      |    |      | 43      | -            | Sí          | Sí           | -            | [39] |
| 180 | Mujer   | COL4A4 | NC_000002.11:g.227927272C>T                    | NM_000092.4:c.2030G>A               | NP_000083.3:p.Gly677Asp          | 72      | 72      |    |      | 72      | -            | Sí          | Sí           | -            | [39] |
| 181 | Hombr e | COL4A3 | NC_000002.11:g.228162549G>A                    | NM_000091.4:c.3725G>A               | NP_000082.2:p.Gly1242Asp         | 21      | 28      | 30 | ESRD | 21      | -            | Sí          | Sí           | Sí           | [24] |
| 182 | Mujer   | COL4A3 | NC_000002.11:g.228162549G>A                    | NM_000091.4:c.3725G>A               | NP_000082.2:p.Gly1242Asp         | 25      | 25      |    |      | 25      | Sí           | -           | Sí           | -            | [24] |
| 183 | Mujer   | COL4A3 | NC_000002.11:g.228162549G>A                    | NM_000091.4:c.3725G>A               | NP_000082.2:p.Gly1242Asp         | 38      | 38      |    |      | <38     | -            | -           | Sí           | -            | [24] |
| 184 | Hombr e | COL4A3 | NC_000002.11:g.228162549G>A                    | NM_000091.4:c.3725G>A               | NP_000082.2:p.Gly1242Asp         | 47      | 47      |    |      | 47      | Sí           | -           | Sí           | -            | [24] |
| 185 | Mujer   | COL4A3 | NC_000002.11:g.228162549G>A                    | NM_000091.4:c.3725G>A               | NP_000082.2:p.Gly1242Asp         | 49      | 49      |    |      | 49      | Sí           | -           | Sí           | -            | [24] |
| 186 | Hombr e | COL4A3 | NC_000002.11:g.228162549G>A                    | NM_000091.4:c.3725G>A               | NP_000082.2:p.Gly1242Asp         | 50      | 50      |    |      | 50      | Sí           | -           | Sí           | -            | [24] |
| 187 | Hombr e | COL4A3 | NC_000002.11:g.228162549G>A                    | NM_000091.4:c.3725G>A               | NP_000082.2:p.Gly1242Asp         | 44      | 44      |    |      | 44      | Sí           | -           | Sí           | -            | [24] |
| 188 | Mujer   | COL4A4 | NC_000002.11:g.227920741C>T                    | NM_000092.4:c.2636G>A               | NP_000083.3:p.Gly879Glu          | 55      | 63      | 63 | ESRD | 55      | -            | -           | -            | -            | [24] |
| 189 | Mujer   | COL4A4 | NC_000002.11:g.227920741C>T                    | NM_000092.4:c.2636G>A               | NP_000083.3:p.Gly879Glu          | 30      | 30      |    |      | 30      | -            | -           | Sí           | -            | [24] |
| 190 | Hombr e | COL4A3 | NC_000002.11:g.228154724G>A                    | NM_000091.4:c.2990G>A               | NP_000082.2:p.Gly997Glu          | 35      | 45      | 45 | CKD  | 35      | -            | Sí          | Sí           | -            | [24] |
| 191 | Mujer   | COL4A3 | NC_000002.11:g.228154724G>A                    | NM_000091.4:c.2990G>A               | NP_000082.2:p.Gly997Glu          | 20      | 55      | 55 | ESRD | 20      | -            | -           | Sí           | -            | [24] |
| 192 | Mujer   | COL4A3 | NC_000002.11:g.228154724G>A                    | NM_000091.4:c.2990G>A               | NP_000082.2:p.Gly997Glu          | unknown | unknown |    |      | unknown | -            | Sí          | Sí           | -            | [24] |
| 193 | Mujer   | COL4A3 | NC_000002.11:g.228154724G>A                    | NM_000091.4:c.2990G>A               | NP_000082.2:p.Gly997Glu          | unknown | unknown |    |      | unknown | -            | Sí          | Sí           | -            | [24] |
| 194 | Mujer   | COL4A3 | NC_000002.11:g.228110690delG                   | NM_000091.4:c.345delG               | NP_000082.2:p.G115GFSX37         | 32      | 48      | 32 | CKD  | 32      | Sí           | Desconocido | Sí           | Sí           | [20] |
| 195 | Hombr e | COL4A3 | NC_000002.11:g.228110690delG                   | NM_000091.4:c.345delG               | NP_000082.2:p.G115GFSX37         | 6       |         | 19 | CKD  |         | Sí           | Sí          | Sí           | Sí           | [20] |
| 196 | Mujer   | COL4A3 | NC_000002.11:g.228169782G>T                    | NM_000091.4:c.4235G>T               | NP_000082.2:p.G1412V             | 24      | 52      | 31 | ESRD | 24      | Desconoci do | Sí          | Sí           | Sí           | [20] |
| 197 | Hombr e | COL4A3 | NC_000002.11:g.228169782G>T                    | NM_000091.4:c.4235G>T               | NP_000082.2:p.G1412V             | 29      | 53      | 34 | ESRD | 29      | Sí           | Desconocido | Sí           | Desconoci do | [20] |
| 198 | Hombr e | COL4A3 | NC_000002.11:g.228169782G>T                    | NM_000091.4:c.4235G>T               | NP_000082.2:p.G1412V             | 67      | 83      | 75 | CKD  | 75      | Desconoci do | Desconocido | Desconoci do | Sí           | [20] |
| 199 | Mujer   | COL4A4 | NC_000002.11:g.227876963G>A                    | NM_000092.4:c.4267C>T               | NP_000083.3:p.P1423S             | 6       | 49      |    |      | 28      | Desconoci do | Sí          | Sí           | Sí           | [20] |
| 200 | Mujer   | COL4A4 | NC_000002.11:g.227876963G>A                    | NM_000092.4:c.4267C>T               | NP_000083.3:p.P1423S             |         |         |    | CKD  |         | Sí           | Desconocido | Sí           | Sí           | [20] |
| 201 | Hombr e | COL4A4 | NC_000002.11:g.227876963G>A                    | NM_000092.4:c.4267C>T               | NP_000083.3:p.P1423S             |         |         |    | ESRD |         | Sí           | Desconocido | Sí           | Desconoci do | [20] |
| 202 | Hombr e | COL4A4 | NC_000002.11:g.228004876C>G                    | NM_000092.4: c.192+1G>C             |                                  | 30      | 55      |    |      | 40      | Desconoci do | Sí          | Sí           | Desconoci do | [20] |
| 203 | Hombr e | COL4A4 | NC_000002.11:g.228004876C>G                    | NM_000092.4: c.192+1G>C             |                                  | 75      |         |    |      |         | Sí           | Desconocido | Sí           | Sí           | [20] |
| 204 | Hombr e | COL4A3 | NC_000002.11:g.228029482_228029505del          | NM_000091.4:c.40_63del              | NP_000082.2:p.Leu14_Leu21del     | 4       | 14      |    |      | 4       | Desconoci do | Sí          | Sí           | Desconoci do | [20] |
| 205 | Hombr e | COL4A3 | NC_000002.11:g.228029482_228029505del          | NM_000091.4:c.40_63del              | NP_000082.2:p.Leu14_Leu21del     |         | 46      |    |      |         | Sí           | Sí          | Desconoci do | Sí           | [20] |
| 206 | Mujer   | COL4A3 | NC_000002.11:g.228162416G>A                    | NM_000091.4:c.3592G>A               | NP_000082.2:p.Gly1198Ser         | 28      | 39      |    |      |         | Desconoci do | Sí          | Sí           | Desconoci do | [20] |
| 207 | Mujer   | COL4A3 | NC_000002.11:g.228158017_228158025delAAGTCCTGG | NM_000091.4:c.3321_3329delAAGTCCTGG | NP_000082.2:p.Ser1108_Gly1110del | 32      | 32      |    |      |         | Desconoci do | Sí          | Sí           | Desconoci do | [20] |

|     |         |         |                                                          |                                              |                                |    |    |    |                      |    |              |             |              |              |      |
|-----|---------|---------|----------------------------------------------------------|----------------------------------------------|--------------------------------|----|----|----|----------------------|----|--------------|-------------|--------------|--------------|------|
| 208 | Hombr e | COL4A 4 | NC_000002.11:g.227958868C>T                              | NM_000092.4:c.1342G>A                        | NP_000083.3:p.Gly448Ser        | 28 | 35 | 28 | Non-progressi ve CRF |    | Desconoci do | Sí          | Sí           | Desconoci do | [21] |
| 209 | Hombr e | COL4A 4 | NC_000002.11:g.227958874_227958891delCTCCAGGCAAG CCAGGTG | NM_000092.4:c.1323_1340delTGGCTTGCTGGAGCA CC | NP_000083.3:p.Gly442_Pro447del | 44 | 66 | 59 | ESRD                 | 27 | Sí           | Desconocido | Sí           | Desconoci do | [35] |
| 210 | Hombr e | COL4A 4 | NC_000002.11:g.227958874_227958891delCTCCAGGCAAG CCAGGTG | NM_000092.4:c.1323_1340delTGGCTTGCTGGAGCA CC | NP_000083.3:p.Gly442_Pro447del | 6  | 29 |    |                      | 6  | Sí           | Desconocido | Sí           | Desconoci do | [35] |
| 211 | Mujer   | COL4A 4 | NC_000002.11:g.227872267A>C                              | NM_000092.4:c.4847T>G                        | NP_000083.3:p.Leu1616Arg       | 23 | 67 |    |                      | 23 | Sí           | Desconocido | Sí           | Desconoci do | [35] |
| 212 | Mujer   | COL4A 4 | NC_000002.11:g.227872267A>C                              | NM_000092.4:c.4847T>G                        | NP_000083.3:p.Leu1616Arg       | 15 | 42 |    |                      | 15 | Sí           | Desconocido | Sí           | Desconoci do | [35] |
| 213 | Hombr e | COL4A 4 | NC_000002.11:g.227967903C>G                              | NM_000092.4:c.827G>C                         | NP_000083.3:p.Gly276Ala        | 31 | 61 | 58 | ESRD                 | 31 | Sí           | Desconocido | Sí           | Desconoci do | [35] |
| 214 | Mujer   | COL4A 4 | NC_000002.11:g.227967903C>G                              | NM_000092.4:c.827G>C                         | NP_000083.3:p.Gly276Ala        | 12 | 30 |    |                      | 12 | Sí           | Desconocido | Sí           | Desconoci do | [35] |
| 215 | Hombr e | COL4A 4 | NC_000002.11:g.227886851G>A                              | NM_000092.4:c.4129C>T                        | NP_000083.3:p.Arg1377*         | 23 | 54 |    |                      | 23 | Sí           | Desconocido | Sí           | Desconoci do | [35] |
| 216 | Mujer   | COL4A 4 | NC_000002.11:g.227964378C>G                              | NM_000092.4:c.1057G>C                        | NP_000083.3:p.Gly353Arg        | 9  | 49 |    |                      | 9  | Sí           | Desconocido | Sí           | Desconoci do | [35] |
| 217 | Mujer   | COL4A 4 | NC_000002.11:g.227967903C>G                              | NM_000092.4:c.827G>C                         | NP_000083.3:p.Gly276Ala        | 42 | 64 |    |                      | 42 | Sí           | Desconocido | Sí           | Desconoci do | [35] |
| 218 | Mujer   | COL4A 4 | NC_000002.11:g.227898125C>T                              | NM_000092.4:c.3577+1G>A                      |                                | 35 | 61 |    |                      | 35 | Sí           | Desconocido | Sí           | Desconoci do | [35] |
| 219 | Hombr e | COL4A 3 | NC_000002.11:g.228169754G>A                              | NM_000091.4:c.4207G>A                        | NP_000082.2:p.Gly1403Arg       | 5  | 33 |    |                      | 5  | Sí           | Desconocido | Sí           | Desconoci do | [35] |
| 220 | Mujer   | COL4A 3 | NC_000002.11:g.228159725G>A                              | NM_000091.4:c.3464G>A                        | NP_000082.2:p.Gly1155Asp       | 44 | 69 |    |                      | 44 | Sí           | Desconocido | Sí           | Sí           | [35] |
| 221 | Hombr e | COL4A 3 | NC_000002.11:g.228159725G>A                              | NM_000091.4:c.3464G>A                        | NP_000082.2:p.Gly1155Asp       | 13 | 55 |    |                      | 13 | Sí           | Desconocido | Sí           | Desconoci do | [35] |
| 222 | Hombr e | COL4A 3 | NC_000002.11:g.228149043G>A                              | NM_000091.4:c.2863G>A                        | NP_000082.2:p.Gly955Arg        | 6  | 50 | 42 | ESRD                 | 6  | Sí           | Desconocido | Sí           | Sí           | [35] |
| 223 | Mujer   | COL4A 3 | NC_000002.11:g.228109073G>T                              | NM_000091.4:c.272G>T                         | NP_000082.2:p.Gly91Val         | 6  |    |    |                      | 6  | Sí           | Desconocido | No           | Desconoci do | [35] |
| 224 | Mujer   | COL4A 3 | NC_000002.11:g.228120751G>A                              | NM_000091.4:c.898G>A                         | NP_000082.2:p.Gly300Arg        | 35 |    |    |                      | 35 | Sí           | Desconocido | Sí           | Sí           | [35] |
| 225 | Hombr e | COL4A 3 | NC_000002.11:g.228128564G>A                              | NM_000091.4:c.1219G>A                        | NP_000082.2:p.Gly407Ser        | 26 |    |    |                      | 26 | Sí           | Desconocido | Sí           | Desconoci do | [35] |
| 226 | Hombr e | COL4A 3 | NC_000002.11:g.228134680G>A                              | NM_000091.4:c.1559G>A                        | NP_000082.2:p.Gly520Asp        | 4  |    |    |                      | 4  | Sí           | Desconocido | No           | Desconoci do | [35] |
| 227 | Mujer   | COL4A 3 | NC_000002.11:g.228135597G>A                              | NM_000091.4:c.1687G>A                        | NP_000082.2:p.Gly563Arg        | 25 |    |    |                      | 25 | Sí           | Desconocido | Desconoci do | Sí           | [35] |
| 228 | Hombr e | COL4A 3 | NC_000002.11:g.228141157G>A                              | NM_000091.4:c.1984G>A                        | NP_000082.2:p.Gly662Arg        | 69 |    |    | ESRD                 | 69 | Sí           | Desconocido | Sí           | Desconoci do | [35] |
| 229 | Hombr e | COL4A 3 | NC_000002.11:g.228169782G>A                              | NM_000091.4:c.4235G>A                        | NP_000082.2:p.Gly1412Asp       | 38 |    |    |                      | 38 | Sí           | Desconocido | Sí           | Desconoci do | [35] |
| 230 | Hombr e | COL4A 3 | NC_000002.11:g.228175623_228175624delCA                  | NM_000091.4:c.4887_4888delCA                 | NP_000082.2:p.Tyr1629*         | 7  |    |    |                      | 7  | Sí           | Desconocido | Sí           | Sí           | [35] |
| 231 | Mujer   | COL4A 4 | NC_000002.11:g.227946893C>G                              | NM_000092.4:c.1634G>C                        | NP_000083.3:p.Gly545Ala        | 32 |    |    |                      | 32 | Sí           | Desconocido | Sí           | Desconoci do | [29] |
| 232 | Mujer   | COL4A 4 | NC_000002.11:g.227946893C>G                              | NM_000092.4:c.1634G>C                        | NP_000083.3:p.Gly545Ala        | 23 |    |    |                      |    | Desconoci do | Desconocido | Desconoci do | Sí           | [29] |
| 233 | Mujer   | COL4A 4 | NC_000002.11:g.227924288_227924289insG                   | NM_000092.4:c.2219_2220insC                  | NP_000083.3:p.Val741Cysfs*47   | 15 |    |    |                      | 15 | Sí           | Desconocido | Sí           | Sí           | [29] |
| 234 | Hombr e | COL4A 4 | NC_000002.11:g.227920687C>T                              | NM_000092.4:c.2690G>A                        | NP_000083.3:p.Gly897Glu        | 48 |    |    |                      | 48 | Sí           | Desconocido | Sí           | Desconoci do | [29] |
| 235 | Mujer   | COL4A 4 | NC_000002.11:g.227896736C>A                              | NM_000092.4:c.3742G>T                        | NP_000083.3:p.Gly1248*         | 41 |    | 41 | ESRD                 | 41 | No           | Desconocido | Sí           | Sí           | [29] |
| 236 | Mujer   | COL4A 4 | NC_000002.11:g.227872294delG                             | NM_000092.4:c.4820delC                       | NP_000083.3:p.Ala1607Valfs*49  | 4  |    |    |                      | 4  | Sí           | Desconocido | No           | Desconoci do | [29] |
| 237 | Mujer   | COL4A 3 | NC_000002.11:g.228131783C>T                              | NM_000091.4:c.1483C>T                        | NP_000082.2:p.His495Tyr        | 11 |    |    |                      | 11 | Sí           | Desconocido | No           | Desconoci do | [29] |
| 238 | Mujer   | COL4A 3 | NC_000002.11:g.228159715G>T                              | NM_000091.4:c.3454G>T                        | NP_000082.2:p.Gly1152Cys       | 10 |    |    |                      | 10 | Sí           | Desconocido | No           | Desconoci do | [29] |
| 239 | Mujer   | COL4A 3 | NC_000002.11:g.228162399G>A                              | NM_000091.4:c.3575G>A                        | NP_000082.2:p.Gly1192Glu       | 4  |    |    |                      | 4  | Sí           | Desconocido | Sí           | Desconoci do | [29] |
| 240 | Mujer   | COL4A 4 | NC_000002.11:g.228009262_228009267delGAGTAT              | NM_000092.4:c.81_86delACTCAT                 | NP_000083.3:p.Leu28_Ile29del   | 9  |    |    |                      | 9  | Sí           | Desconocido | No           | Desconoci do | [29] |
| 241 | Hombr e | COL4A 4 | NC_000002.11:g.227973556C>T                              | NM_000092.4:c.686G>A                         | NP_000083.3:p.Gly229Asp        | 15 |    |    |                      | 15 | Sí           | Desconocido | No           | Desconoci do | [29] |
| 242 | Hombr e | COL4A 4 | NC_000002.11:g.227954647C>T                              | NM_000092.4:c.1396G>A                        | NP_000083.3:p.Gly466Arg        | 13 |    |    |                      | 13 | Sí           | Desconocido | Sí           | Desconoci do | [29] |
| 243 | Hombr e | COL4A 4 | NC_000002.11:g.227946893C>G                              | NM_000092.4:c.1634G>C                        | NP_000083.3:p.Gly545Ala        | 25 |    |    |                      | 25 | Sí           | Desconocido | Sí           | Desconoci do | [29] |
| 244 | Hombr e | COL4A 4 | NC_000002.11:g.227946893C>G                              | NM_000092.4:c.1634G>C                        | NP_000083.3:p.Gly545Ala        | 5  |    |    |                      | 5  | Sí           | Desconocido | No           | Desconoci do | [29] |
| 245 | Mujer   | COL4A 4 | NC_000002.11:g.227924333delC                             | NM_000092.4:c.2171delG                       | NP_000083.3:p.Arg724Leufs*29   | 40 |    |    |                      | 40 | Sí           | Desconocido | No           | Desconoci do | [29] |
| 246 | Hombr e | COL4A 4 | NC_000002.11:g.227915821C>T                              | NM_000092.4:c.3022G>A                        | NP_000083.3:p.Gly1008Arg       | 8  |    |    |                      | 8  | Sí           | Desconocido | No           | Desconoci do | [29] |
| 247 | Hombr e | COL4A 4 | NC_000002.11:g.227886772_227886773insG                   | NM_000092.4:c.4208_4209insC                  | NP_000083.3:p.Gly1404Argfs*29  | 41 |    |    |                      | 41 | Sí           | Desconocido | Desconoci do | Desconoci do | [29] |
| 248 | Hombr e | COL4A 4 | NC_000002.11:g.227872069C>T                              | NM_000092.4:c.5045G>A                        | NP_000083.3:p.Arg1682Gln       | 13 |    |    |                      | 13 | Sí           | Desconocido | No           | Desconoci do | [29] |

|     |         |         |                             |                       |                          |    |    |    |      |      |    |              |             |              |              |      |
|-----|---------|---------|-----------------------------|-----------------------|--------------------------|----|----|----|------|------|----|--------------|-------------|--------------|--------------|------|
| 249 | Hombr e | COL4A 4 | NC_000002.11:g.227872066C>T | NM_000092.4:c.5048G>A | NP_000083.3:p.Cys1683Tyr | 14 |    |    |      |      | 14 | Sí           | Desconocido | Sí           | Desconoci do | [29] |
| 250 | Mujer   | COL4A 3 | NC_000002.11:g.228122337G>T | NM_000091.4:c.1006G>T | NP_000082.2:p.Gly336Cys  | 23 | 23 |    |      |      |    | Sí           | Desconocido | Sí           | Desconoci do | [29] |
| 251 | Mujer   | COL4A 3 | NC_000002.11:g.228131171G>A | NM_000091.4:c.1354G>A | NP_000082.2:p.Gly452Arg  | 5  | 5  |    |      |      |    | Sí           | Desconocido | Sí           | Desconoci do | [29] |
| 252 | Hombr e | COL4A 3 | NC_000002.11:g.228131171G>A | NM_000091.4:c.1354G>A | NP_000082.2:p.Gly452Arg  | 2  | 2  |    |      |      |    | Sí           | Desconocido | Sí           | Desconoci do | [29] |
| 253 | Mujer   | COL4A 3 | NC_000002.11:g.228131171G>A | NM_000091.4:c.1354G>A | NP_000082.2:p.Gly452Arg  | 14 | 14 |    |      |      |    | Sí           | Desconocido | Desconoci do | Desconoci do | [29] |
| 254 | Mujer   | COL4A 3 | NC_000002.11:g.228131171G>A | NM_000091.4:c.1354G>A | NP_000082.2:p.Gly452Arg  | 39 | 39 |    |      |      |    | Sí           | Desconocido | Desconoci do | Desconoci do | [29] |
| 255 | Hombr e | COL4A 3 | NC_000002.11:g.228131171G>A | NM_000091.4:c.1354G>A | NP_000082.2:p.Gly452Arg  | 42 | 42 |    |      |      |    | Sí           | Desconocido | No           | Desconoci do | [29] |
| 256 | Mujer   | COL4A 3 | NC_000002.11:g.228131171G>A | NM_000091.4:c.1354G>A | NP_000082.2:p.Gly452Arg  | 73 | 73 |    |      | ESRD |    | Sí           | Desconocido | Sí           | Desconoci do | [29] |
| 257 | Mujer   | COL4A 3 | NC_000002.11:g.228142227G>A | NM_000091.4:c.2083G>A | NP_000082.2:p.Gly695Arg  | 43 | 43 | 38 | CRD  |      |    | Sí           | Desconocido | Sí           | Sí           | [29] |
| 258 | Hombr e | COL4A 3 | NC_000002.11:g.228142227G>A | NM_000091.4:c.2083G>A | NP_000082.2:p.Gly695Arg  | 21 | 21 |    |      |      |    | Sí           | Desconocido | Sí           | Desconoci do | [29] |
| 259 | Mujer   | COL4A 3 | NC_000002.11:g.228142227G>A | NM_000091.4:c.2083G>A | NP_000082.2:p.Gly695Arg  | 23 | 23 |    |      |      |    | Sí           | Desconocido | Sí           | Desconoci do | [29] |
| 260 | Mujer   | COL4A 3 | NC_000002.11:g.228142227G>A | NM_000091.4:c.2083G>A | NP_000082.2:p.Gly695Arg  | 40 | 40 |    |      |      |    | Sí           | Desconocido | Sí           | Sí           | [29] |
| 261 | Mujer   | COL4A 3 | NC_000002.11:g.228142227G>A | NM_000091.4:c.2083G>A | NP_000082.2:p.Gly695Arg  | 41 | 41 |    |      |      |    | Sí           | Desconocido | No           | Desconoci do | [29] |
| 262 | Hombr e | COL4A 3 | NC_000002.11:g.228142227G>A | NM_000091.4:c.2083G>A | NP_000082.2:p.Gly695Arg  | 42 | 42 |    |      |      |    | Sí           | Desconocido | No           | Desconoci do | [29] |
| 263 | Hombr e | COL4A 3 | NC_000002.11:g.228142227G>A | NM_000091.4:c.2083G>A | NP_000082.2:p.Gly695Arg  | 43 | 43 |    |      |      |    | Sí           | Desconocido | Sí           | Desconoci do | [29] |
| 264 | Hombr e | COL4A 3 | NC_000002.11:g.228142227G>A | NM_000091.4:c.2083G>A | NP_000082.2:p.Gly695Arg  | 44 | 44 |    |      |      |    | Sí           | Desconocido | Sí           | Desconoci do | [29] |
| 265 | Mujer   | COL4A 3 | NC_000002.11:g.228142227G>A | NM_000091.4:c.2083G>A | NP_000082.2:p.Gly695Arg  |    | 70 | 70 | ESRD |      |    | Sí           | Desconocido | Sí           | Desconoci do | [29] |
| 266 | Hombr e | COL4A 3 | NC_000002.11:g.228142227G>A | NM_000091.4:c.2083G>A | NP_000082.2:p.Gly695Arg  | 71 | 71 |    |      |      |    | Sí           | Desconocido | Sí           | Desconoci do | [29] |
| 267 | Mujer   | COL4A 3 | NC_000002.11:g.228157935G>C | NM_000091.4:c.3239G>C | NP_000082.2:p.Gly1080Ala | 50 | 50 |    |      |      |    | Sí           | Desconocido | No           | Sí           | [29] |
| 268 | Mujer   | COL4A 3 | NC_000002.11:g.228157935G>C | NM_000091.4:c.3239G>C | NP_000082.2:p.Gly1080Ala |    | 80 | 72 | ESRD |      |    | Sí           | Desconocido | Sí           | Sí           | [29] |
| 269 | Mujer   | COL4A 4 | NC_000002.11:g.227985840G>A | NM_000092.4:c.217C>T  | NP_000083.3:p.Gln73*     | 7  | 7  |    |      |      |    | Sí           | Desconocido | Sí           | Desconoci do | [26] |
| 270 | Mujer   | COL4A 4 | NC_000002.11:g.227985840G>A | NM_000092.4:c.217C>T  | NP_000083.3:p.Gln73*     | 39 | 39 |    |      |      |    | Sí           | Desconocido | No           | Desconoci do | [26] |
| 271 | Hombr e | COL4A 4 | NC_000002.11:g.227985840G>A | NM_000092.4:c.217C>T  | NP_000083.3:p.Gln73*     | 41 | 41 |    |      |      |    | Sí           | Desconocido | Desconoci do | Desconoci do | [26] |
| 272 | Hombr e | COL4A 4 | NC_000002.11:g.227985840G>A | NM_000092.4:c.217C>T  | NP_000083.3:p.Gln73*     |    | 65 | 65 | ESRD |      |    | Sí           | Desconocido | Sí           | Desconoci do | [26] |
| 273 | Hombr e | COL4A 4 | NC_000002.11:g.227985840G>A | NM_000092.4:c.217C>T  | NP_000083.3:p.Gln73*     |    | 65 | 65 | ESRD |      |    | Sí           | Desconocido | Sí           | Desconoci do | [26] |
| 274 | Hombr e | COL4A 4 | NC_000002.11:g.227985840G>A | NM_000092.4:c.217C>T  | NP_000083.3:p.Gln73*     |    | 70 | 70 | ESRD |      |    | Sí           | Desconocido | Sí           | Desconoci do | [26] |
| 275 | Hombr e | COL4A 4 | NC_000002.11:g.227985840G>A | NM_000092.4:c.217C>T  | NP_000083.3:p.Gln73*     | 75 | 75 | 60 | ESRD |      |    | Sí           | Desconocido | Desconoci do | Desconoci do | [26] |
| 276 | Hombr e | COL4A 4 | NC_000002.11:g.227963505C>T | NM_000092.4:c.1109G>A | NP_000083.3:p.Gly370Glu  | 14 | 14 |    |      |      |    | Sí           | Desconocido | Sí           | Desconoci do | [26] |
| 277 | Mujer   | COL4A 4 | NC_000002.11:g.227963505C>T | NM_000092.4:c.1109G>A | NP_000083.3:p.Gly370Glu  | 7  | 7  |    |      |      |    | Sí           | Desconocido | No           | Desconoci do | [26] |
| 278 | Hombr e | COL4A 4 | NC_000002.11:g.227963505C>T | NM_000092.4:c.1109G>A | NP_000083.3:p.Gly370Glu  | 8  | 8  |    |      |      |    | Sí           | Desconocido | No           | Desconoci do | [26] |
| 279 | Mujer   | COL4A 4 | NC_000002.11:g.227963505C>T | NM_000092.4:c.1109G>A | NP_000083.3:p.Gly370Glu  | 11 | 11 |    |      |      |    | Sí           | Desconocido | No           | Desconoci do | [26] |
| 280 | Hombr e | COL4A 4 | NC_000002.11:g.227963505C>T | NM_000092.4:c.1109G>A | NP_000083.3:p.Gly370Glu  | 33 | 33 |    |      |      |    | Sí           | Desconocido | No           | Desconoci do | [26] |
| 281 | Mujer   | COL4A 4 | NC_000002.11:g.227963505C>T | NM_000092.4:c.1109G>A | NP_000083.3:p.Gly370Glu  | 39 | 39 |    |      |      |    | Sí           | Desconocido | Sí           | Sí           | [26] |
| 282 | Mujer   | COL4A 4 | NC_000002.11:g.227963505C>T | NM_000092.4:c.1109G>A | NP_000083.3:p.Gly370Glu  | 39 | 39 |    |      |      |    | Sí           | Desconocido | Sí           | Sí           | [26] |
| 283 | Mujer   | COL4A 4 | NC_000002.11:g.227963505C>T | NM_000092.4:c.1109G>A | NP_000083.3:p.Gly370Glu  | 62 | 62 |    |      |      |    | Sí           | Desconocido | Sí           | Sí           | [26] |
| 284 | Hombr e | COL4A 4 | NC_000002.11:g.227963505C>T | NM_000092.4:c.1109G>A | NP_000083.3:p.Gly370Glu  |    | 64 | 53 | ESRD |      |    | Sí           | Desconocido | Sí           | Sí           | [26] |
| 285 | Hombr e | COL4A 4 | NC_000002.11:g.227963505C>T | NM_000092.4:c.1109G>A | NP_000083.3:p.Gly370Glu  |    | 68 | 43 | ESRD |      |    | Desconoci do | Desconocido | Sí           | Sí           | [26] |
| 286 | Hombr e | COL4A 4 | NC_000002.11:g.227963505C>T | NM_000092.4:c.1109G>A | NP_000083.3:p.Gly370Glu  |    | 74 | 59 | ESRD |      |    | Desconoci do | Desconocido | Sí           | Sí           | [26] |
| 287 | Mujer   | COL4A 4 | NC_000002.11:g.227945167C>T | NM_000092.4:c.1795G>A | NP_000083.3:p.Gly599Arg  | 33 | 33 |    |      |      |    | Sí           | Desconocido | Sí           | Desconoci do | [26] |
| 288 | Hombr e | COL4A 4 | NC_000002.11:g.227945167C>T | NM_000092.4:c.1795G>A | NP_000083.3:p.Gly599Arg  | 21 | 21 |    |      |      |    | Sí           | Desconocido | No           | Desconoci do | [26] |
| 289 | Mujer   | COL4A 4 | NC_000002.11:g.227945167C>T | NM_000092.4:c.1795G>A | NP_000083.3:p.Gly599Arg  | 33 | 33 |    |      |      |    | Sí           | Desconocido | No           | Desconoci do | [26] |
| 290 | Mujer   | COL4A 4 | NC_000002.11:g.227945167C>T | NM_000092.4:c.1795G>A | NP_000083.3:p.Gly599Arg  | 59 | 59 |    |      |      |    | Sí           | Desconocido | No           | Desconoci do | [26] |

|     |         |        |                                          |                               |                                        |    |    |    |                 |    |              |             |              |              |            |
|-----|---------|--------|------------------------------------------|-------------------------------|----------------------------------------|----|----|----|-----------------|----|--------------|-------------|--------------|--------------|------------|
| 291 | Mujer   | COL4A4 | NC_000002.11:g.227945167C>T              | NM_000092.4:c.1795G>A         | NP_000083.3:p.Gly599Arg                |    | 74 | 74 | renal trasplant |    | Sí           | Desconocido | No           | Desconoci do | [26]       |
| 292 | Hombr e | COL4A4 | NC_000002.11:g.227920804C>G              | NM_000092.4:c.2573G>C         | NP_000083.3:p.Gly858Ala                | 8  | 8  |    |                 |    | Sí           | Desconocido | Sí           | Desconoci do | [26]       |
| 293 | Mujer   | COL4A4 | NC_000002.11:g.227920804C>G              | NM_000092.4:c.2573G>C         | NP_000083.3:p.Gly858Ala                | 39 | 39 |    |                 |    | Sí           | Desconocido | No           | Desconoci do | [26]       |
| 294 | Hombr e | COL4A4 | NC_000002.11:g.227919418C>T              | NM_000092.4:c.2752G>A         | NP_000083.3:p.Gly918Arg                | 13 | 13 |    |                 |    | Sí           | Desconocido | Sí           | Desconoci do | [26]       |
| 295 | Hombr e | COL4A4 | NC_000002.11:g.227919418C>T              | NM_000092.4:c.2752G>A         | NP_000083.3:p.Gly918Arg                | 18 | 18 |    |                 |    | Sí           | Desconocido | No           | Desconoci do | [26]       |
| 296 | Hombr e | COL4A4 | NC_000002.11:g.227919418C>T              | NM_000092.4:c.2752G>A         | NP_000083.3:p.Gly918Arg                | 40 | 40 |    |                 |    | Sí           | Desconocido | Sí           | Desconoci do | [26]       |
| 297 | Hombr e | COL4A4 | NC_000002.11:g.227919418C>T              | NM_000092.4:c.2752G>A         | NP_000083.3:p.Gly918Arg                |    | 66 | 54 | ESRD            |    | Sí           | Desconocido | Sí           | Desconoci do | [26]       |
| 298 | Mujer   | COL4A4 | NC_000002.11:g.227886884delG             | NM_000092.4:c.4097delC        | NP_000083.3:p.Pro1366Argfs*22          | 6  | 6  |    |                 |    | Sí           | Desconocido | Sí           | Desconoci do | [26]       |
| 299 | Hombr e | COL4A4 | NC_000002.11:g.227886884delG             | NM_000092.4:c.4097delC        | NP_000083.3:p.Pro1366Argfs*22          | 44 | 44 |    |                 |    | Sí           | Desconocido | No           | Desconoci do | [26]       |
| 300 | Mujer   | COL4A4 | NC_000002.11:g.227875157C>T              | NM_000092.4:c.4394G>A         | NP_000083.3:p.Gly1465Asp               | 37 | 37 |    |                 |    | Sí           | Desconocido | Sí           | Desconoci do | [26]       |
| 301 | Hombr e | COL4A4 | NC_000002.11:g.227875157C>T              | NM_000092.4:c.4394G>A         | NP_000083.3:p.Gly1465Asp               | 34 | 34 |    |                 |    | Sí           | Desconocido | No           | Desconoci do | [26]       |
| 302 | Mujer   | COL4A4 | NC_000002.11:g.227875157C>T              | NM_000092.4:c.4394G>A         | NP_000083.3:p.Gly1465Asp               | 55 | 55 |    |                 |    | Sí           | Desconocido | No           | Desconoci do | [26]       |
| 303 | Mujer   | COL4A4 | NC_000002.11:g.227875157C>T              | NM_000092.4:c.4394G>A         | NP_000083.3:p.Gly1465Asp               | 75 | 75 |    |                 |    | Sí           | Desconocido | No           | Desconoci do | [26]       |
| 304 | Mujer   | COL4A4 | NC_000002.11:g.227875157C>T              | NM_000092.4:c.4394G>A         | NP_000083.3:p.Gly1465Asp               |    | 80 | 80 | ESRD            |    | Sí           | Desconocido | Desconoci do | Desconoci do | [26]       |
| 305 | Hombr e | COL4A4 | NC_000002.11:g.227875111delG             | NM_000092.4:c.4444delC        | NP_000083.3:p.Leu1482Trpfs*70          | 12 | 12 |    |                 |    | Sí           | Desconocido | No           | Desconoci do | [26]       |
| 306 | Hombr e | COL4A4 | NC_000002.11:g.227875111delG             | NM_000092.4:c.4444delC        | NP_000083.3:p.Leu1482Trpfs*70          |    | 31 |    |                 |    | Sí           | Desconocido | Sí           | Desconoci do | [26]       |
| 307 | Hombr e | COL4A4 | NC_000002.11:g.227875111delG             | NM_000092.4:c.4444delC        | NP_000083.3:p.Leu1482Trpfs*70          | 44 | 44 | 38 | ESRD            |    | Desconoci do | Desconocido | Desconoci do | Sí           | [26]       |
| 308 | Hombr e | COL4A4 | NC_000002.11:g.227875111delG             | NM_000092.4:c.4444delC        | NP_000083.3:p.Leu1482Trpfs*70          | 46 | 46 |    |                 |    | Sí           | Desconocido | No           | Sí           | [26]       |
| 309 | Hombr e | COL4A4 | NC_000002.11:g.227872792_227872794delGAC | NM_000092.4:c.4749_4751delGTC | NP_000083.3:p.Gln1583_Ser1584delinsHis | 48 | 48 |    |                 |    | Sí           | Desconocido | Sí           | Sí           | [26]       |
| 310 | Hombr e | COL4A4 | NC_000002.11:g.227872792_227872794delGAC | NM_000092.4:c.4749_4751delGTC | NP_000083.3:p.Gln1583_Ser1584delinsHis | 16 | 16 |    |                 |    | Sí           | Desconocido | No           | Desconoci do | [26]       |
| 311 | Hombr e | COL4A4 | NC_000002.11:g.227872792_227872794delGAC | NM_000092.4:c.4749_4751delGTC | NP_000083.3:p.Gln1583_Ser1584delinsHis |    | 56 | 52 | ESRD            |    | Sí           | Desconocido | Sí           | Desconoci do | [26]       |
| 312 | Hombr e | COL4A4 | NC_000002.11:g.227872792_227872794delGAC | NM_000092.4:c.4749_4751delGTC | NP_000083.3:p.Gln1583_Ser1584delinsHis | 57 | 57 |    |                 |    | Sí           | Desconocido | No           | Desconoci do | [26]       |
| 313 | Hombr e | COL4A3 | NC_000002.11:g.228167817G>A              | NM_000091.4:c.3946G>A         | NP_000082.2:p.Gly1316Ser               | 12 | 12 |    |                 | 12 | Desconoci do | Desconocido | Sí           | Desconoci do | [26]       |
| 314 | Hombr e | COL4A3 | NC_000002.11:g.228124575G>A              | NM_000091.4:c.1096G>A         | NP_000082.2:p.Gly366Arg                | 18 | 18 |    |                 | 18 | -            | -           | Sí           | -            | This Study |
| 315 | Mujer   | COL4A3 | NC_000002.11:g.228121068G>A              | NM_000091.4:c.943G>A          | NP_000082.2:p.Gly315Ser                | 12 | 12 |    |                 | 12 | -            | Sí          | -            | -            | This Study |
| 316 | Mujer   | COL4A3 | NC_000002.11:g.228121068G>A              | NM_000091.4:c.943G>A          | NP_000082.2:p.Gly315Ser                | 50 | 50 |    |                 | 50 | -            | Sí          | -            | -            | This Study |
| 317 | Hombr e | COL4A3 | NC_000002.11:g.228121068G>A              | NM_000091.4:c.943G>A          | NP_000082.2:p.Gly315Ser                | 70 | 84 | 70 | Dialysis        | 70 | -            | -           | -            | Sí           | This study |
